# Supplementary figures and images for: “Orphan” Retrogenes in the Human Genome
Source: PubMed Central journal article supplement — Mol Biol Evol. 2012 Oct 12;30(2):384–96. doi: 10.1093/molbev/mss235 (PMC3548309; doi:10.1093/molbev/mss235), 2012-10-12

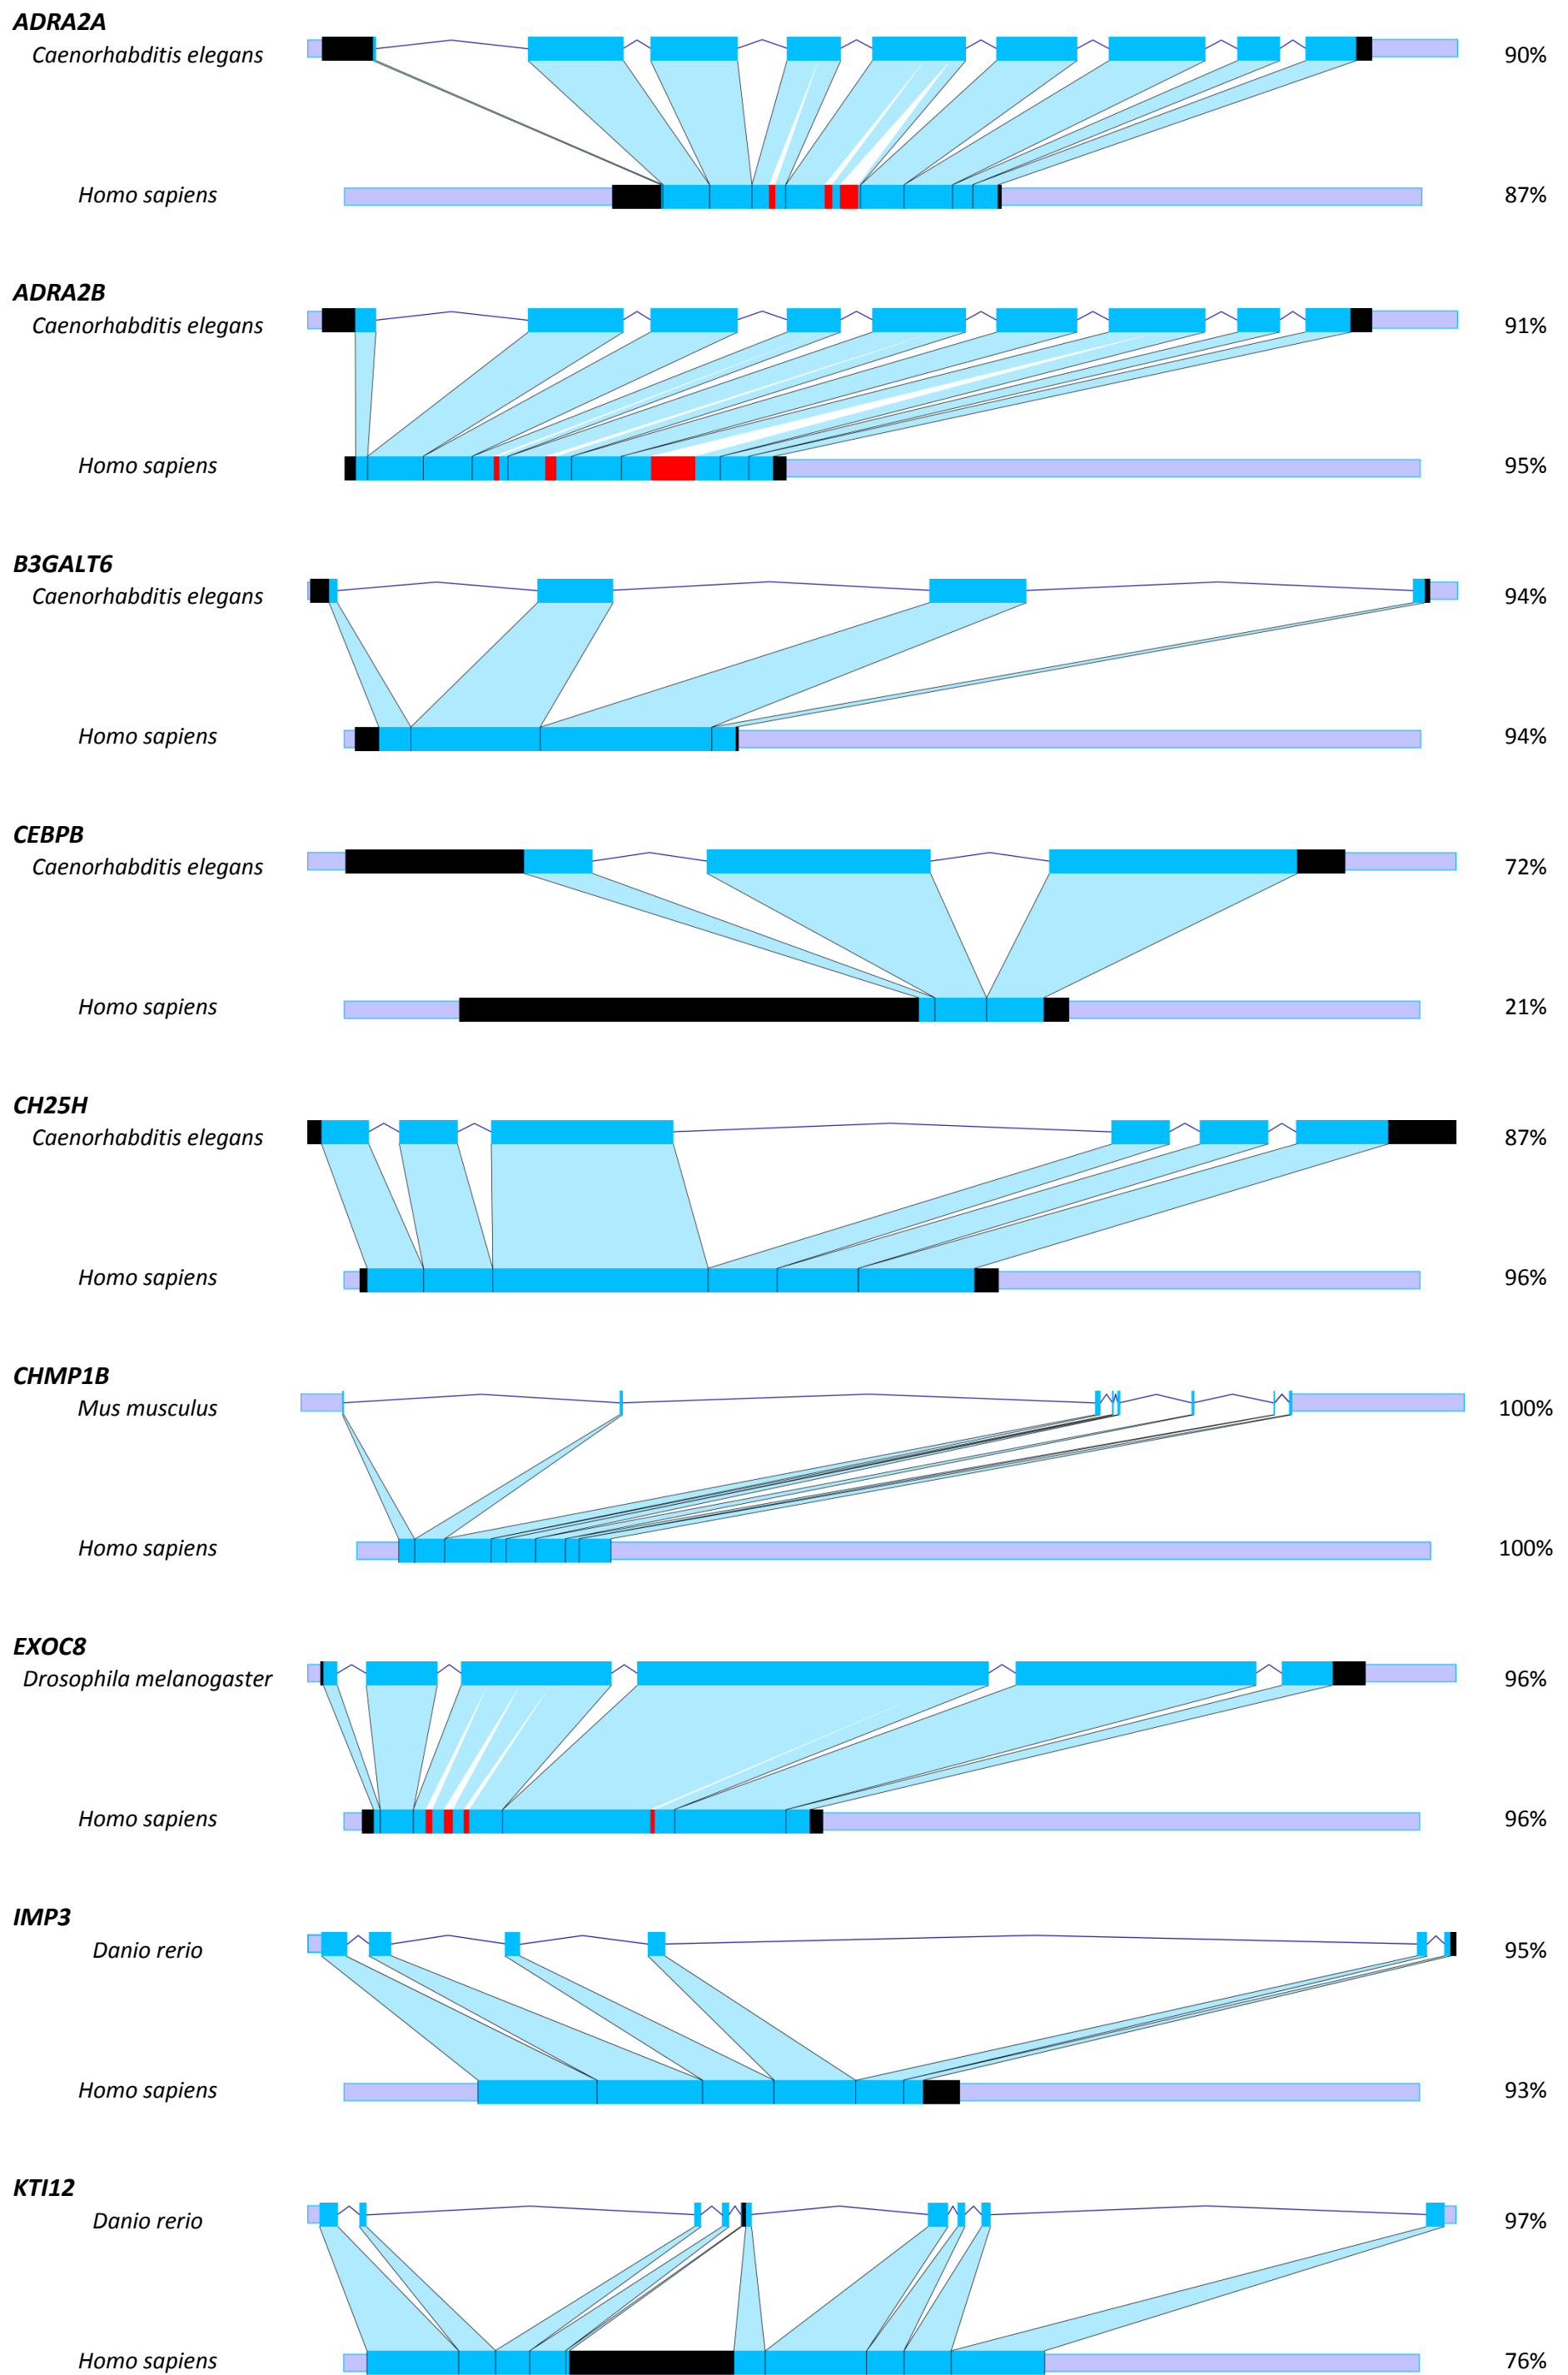

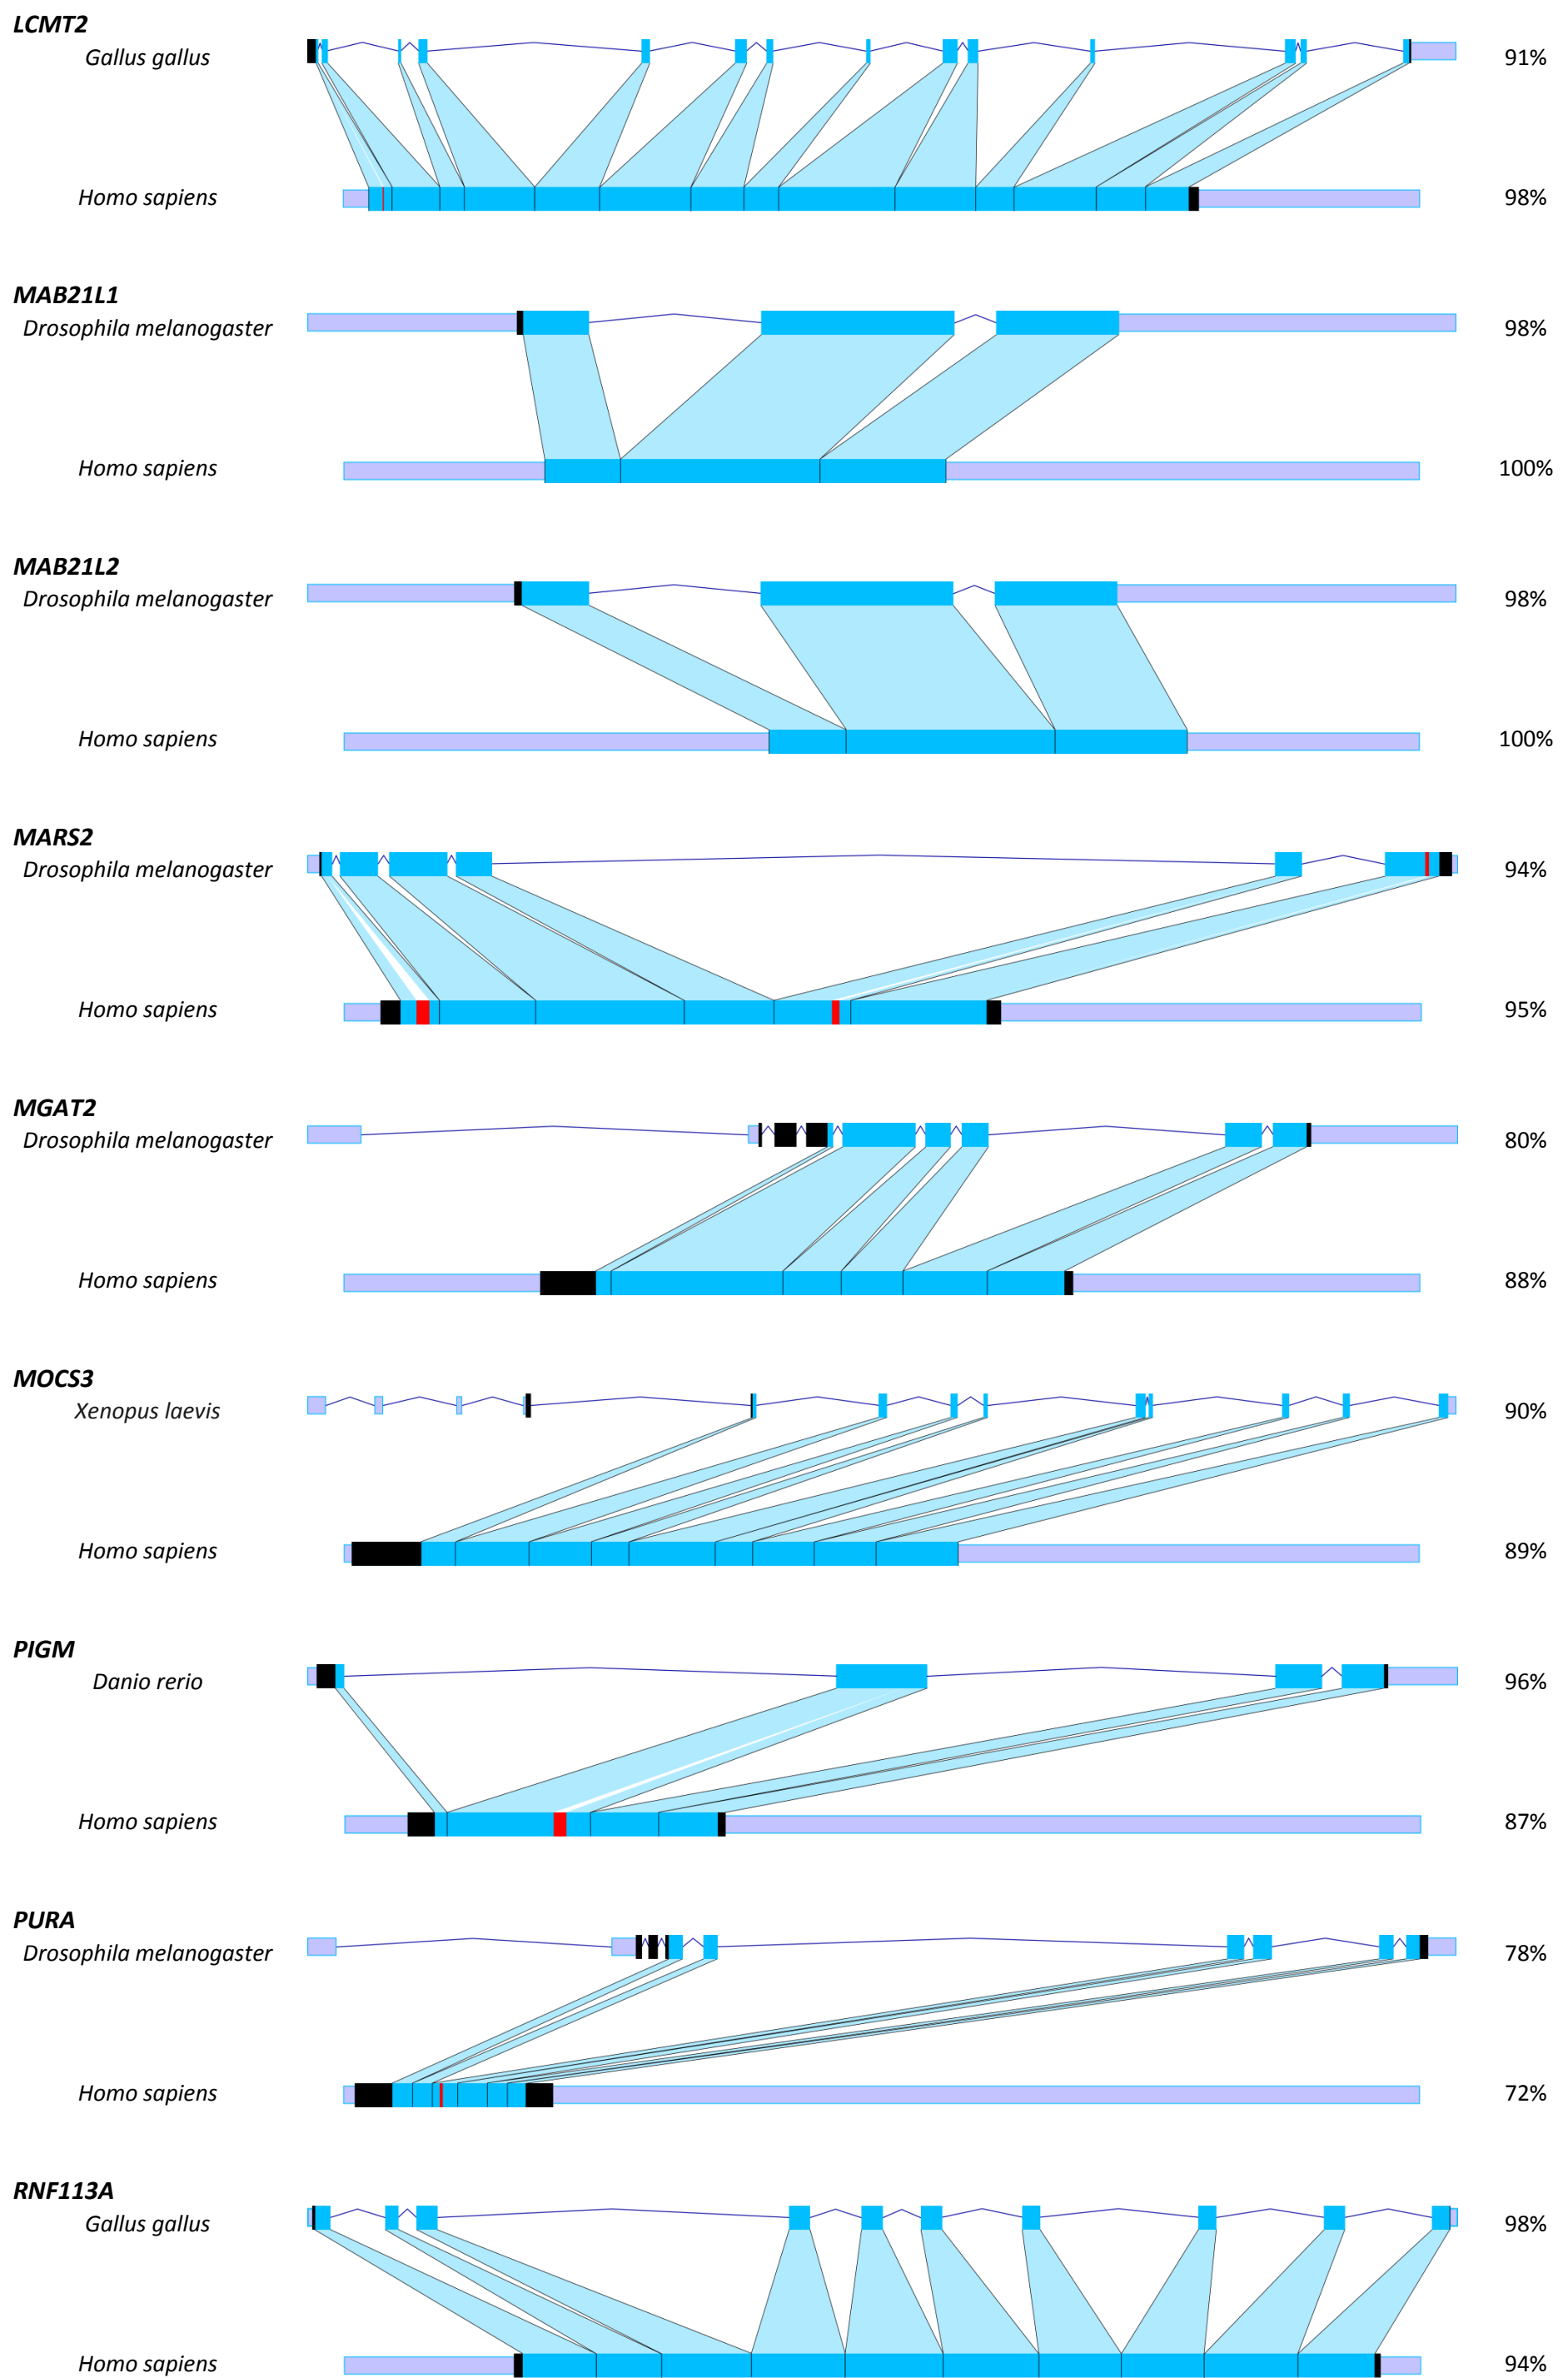

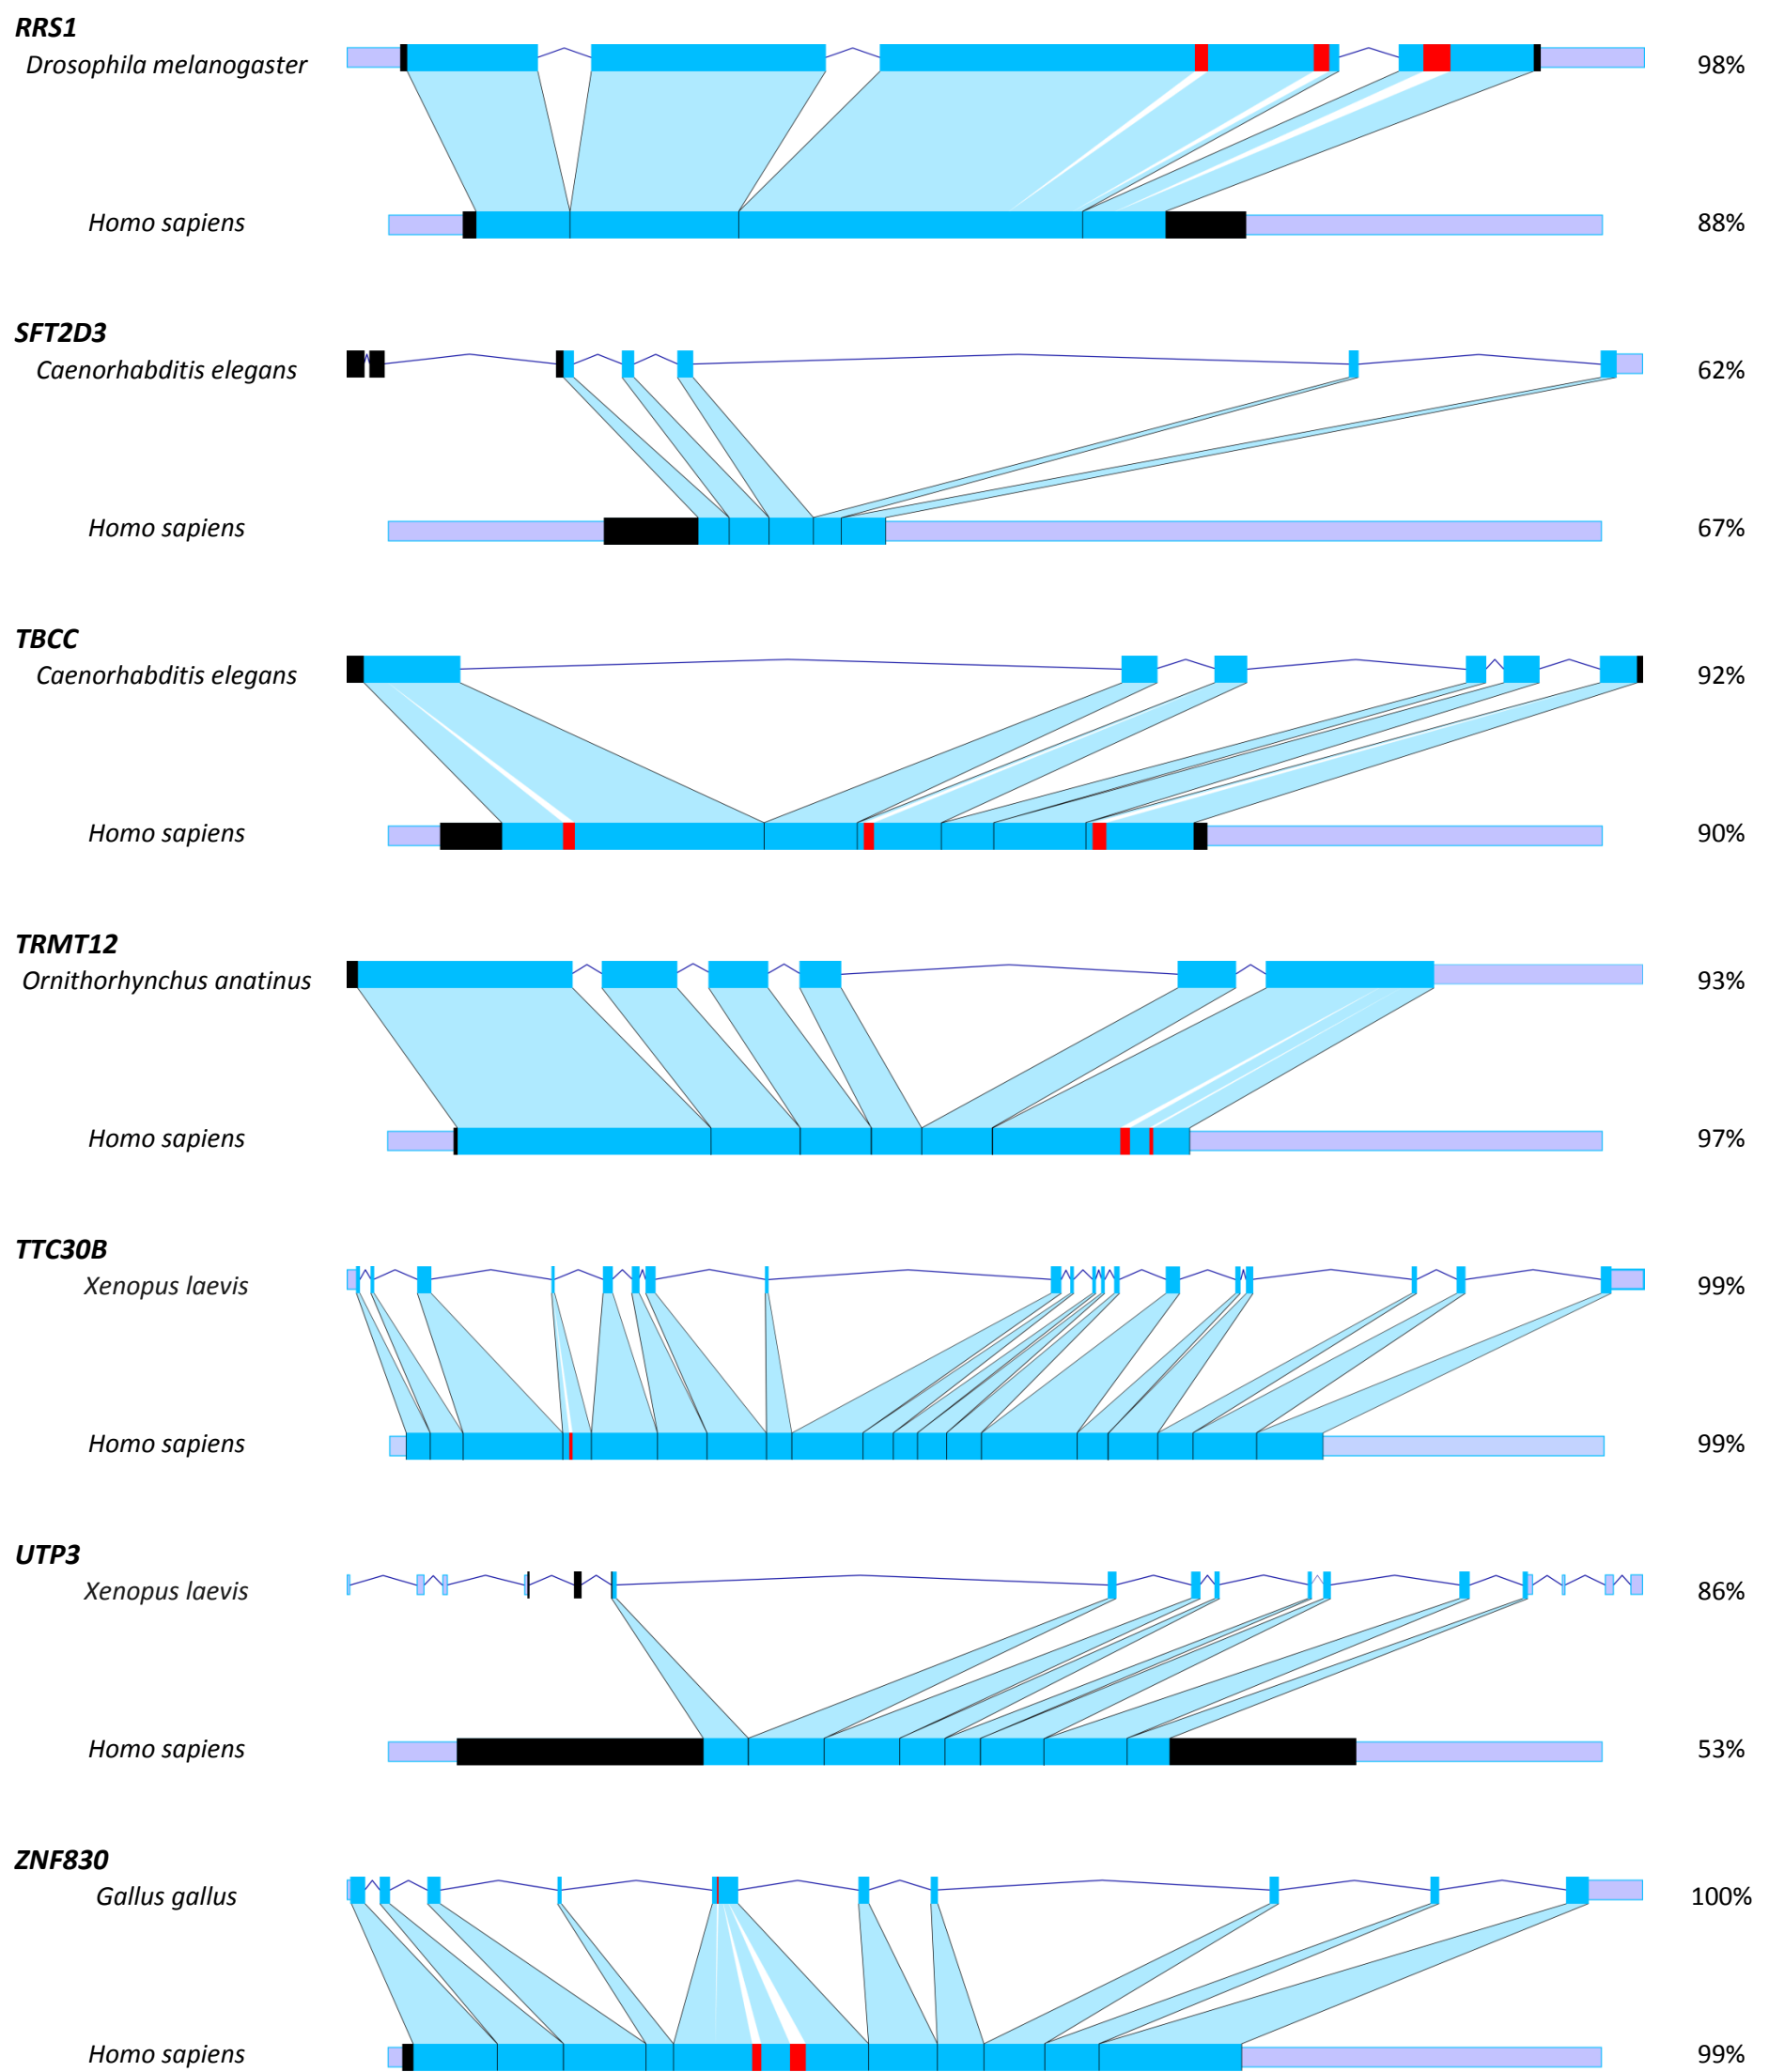

Supplement: supp_mss235_supplementary_file_1.pdf [file supp_mss235_supplementary_file_1.pdf]
